# Supplementary material
Source: MDPI journal article supplement (https://www.mdpi.com/2673-3897/1/2/7)
Supplement: s1 [file s1]

Archive with 3 entries (3 files):
- HOPE COVID19 HOPE COVID19 Supplemental Table 1 Prenatal Surveys.pdf
- HOPE COVID19 Supplemental Table 2 Postnatal Surveys.pdf
- NewSupplemental Table 3 HOPE COVID19 Qualitative Interview Guide.pdf
