# Supplementary material
Source: MDPI journal article supplement (https://www.mdpi.com/2673-3897/1/2/7)
Supplement: s1 [file s1]

Supplemental Table 3. HOPE COVID-19 Qualitative Interview Guide (*draft, courtesy of Dr. Miriam Kuppermann*).

Welcome. Thank you very much for agreeing to talk with me today.

My name is XXX. I am a researcher at UCSF. I am not a health care provider, and I'm not involved in patient care. If you have health-related questions I will try to answer them as best as I can, and I will suggest sources of information if I cannot. We are doing these interviews to better understand women's experiences being pregnant, giving birth, and/or taking care of a newborn during the Coronavirus or COVID-19 pandemic. Our group is trying to learn about how COVID-19 has affected you, your pregnancy and your family.

Before we get started, I want to assure you that everything that you say today is confidential -- we really want you to speak freely and share any thoughts and feelings you have. There are no right or wrong answers. Every comment or question you have is important to us.

We would like to tape record the interview to make sure we don't miss any of your comments when we write up our findings. Your responses will not be linked with your name in any way. Because we are taping, I may remind you once in a while to speak up so that we can hear you clearly when we review the recording. The audio tape will be destroyed once the study is complete.

We really appreciate the time you have taken to share your ideas with us and we look forward to hearing what you have to say. Let's get started.

Do I have your permission to start the tape?

1. Let's start by discussing your pregnancy and how you think being pregnant during the COVID 19 pandemic may have affected your pregnancy.
  - a. In general, how is your pregnancy going/how was your pregnancy?
  - b. How would you describe your physical health during pregnancy?
  - c. How would you describe your mental health during pregnancy?
2. Now I'd like to hear more about any COVID-19 symptoms or testing you may have had.
  - a. Have you had/did you experience any COVID-19 symptoms during your pregnancy?
    - i. If so, what kind of symptoms did you have? Did you seek treatment? Were you admitted to the hospital? How long did your symptoms last/are you still having symptoms? What kinds of changes, if any, did you make to avoid exposing others? How did that affect your pregnancy?
    - ii. If you did not experience any COVID-19 symptoms, did you think about the possibility that you could be exposed to COVID-19? How did that affect your pregnancy?
  - b. Do/did you live or have close contact with anyone who experienced COVID-19 symptoms?
    - i. If so, how did this impact your pregnancy? How did you feel about the possibility of being exposed to COVID-19? What kinds of changes, if any, did you make, avoid contact?
  - c. Do/did you live or have close contact with anyone who was tested for COVID-19

- i. If so, what kind of testing did they have? What were the results? How did you feel about the possibility of being exposed to COVID-19? How did this affect your pregnancy?
  - d. Were you tested for COVID-19 during your pregnancy?
    - i. If yes, what type of testing did you have?
      - 1. Nasal swab to test for the virus?
      - 2. Blood test for antibodies?
      - 3. Anything else?
    - ii. If yes, what were the results?
      - 1. If positive, what kind of symptoms did you experience?
      - 2. If negative, what was the experience like for you?
    - iii. If not, how did you feel about not being tested?
      - 1. What had you heard about testing?
      - 2. Did you want to get tested? Why or why not? If you did want to have testing, why were you not able to do so?
  - e. How different do you think your pregnancy would have been if it had not taken place during the pandemic? What are some of the things that would have been different? And what do you think would have been similar?
  - f. Did you receive your prenatal care in person, via telehealth, or a combinations
    - i. How did you feel about these different forms of care? What did you like most about them? What did you like least? How could they be improved?
  - g. Have you had/did you have conversations with your provider about COVID and the chance of you and or your baby getting COVID?
    - i. What did your provider tell you and what do you remember from that conversation?
    - ii. How did this impact/has this impacted your pregnancy?
    - iii. Where did you get/have you gotten information about COVID? What resources do you trust?
    - iv. Have you done any research on your own about COVID, pregnancy and newborns and if so, how?
- 3. [If postpartum] Now let's talk about your delivery
  - a. How was the delivery?
  - b. Where did it take place?
  - c. How different do you think it would have been if it hadn't taken place during the pandemic? What are some of the things that would have been different? And what would have been the same?
  - d. Were you tested for COVID-19 at the time of your delivery?
    - i. If so, what were the results? How did you feel about the process.
- 4. Now let's talk about taking care of your baby during the pandemic. How has that been going?
  - a. What have you enjoyed the most, and has been most challenging?
  - b. How different do you think having a newborn would be if it wasn't during the pandemic?

5. Now we would like to talk with you about the COVID-19 pandemic and how it has impacted you and your family's life in other ways.
  - a. First, let's talk about your family situation. Can you tell me something about it? Do you have other children, and do they live with you? Do you live with a partner, other family members, or roommates?
  - b. Since the pandemic began, have you been able to spend more time or less time with your family? How has time you spend with them changed?
  - c. Now, we'd like to talk about finances.
    - i. Were you employed before the pandemic began?
    - ii. Have you or anyone in your family/someone you rely on for financial support lost their job as a result of the pandemic?
    - iii. Have you or anyone you rely on for financial support received unemployment or other forms of compensation to help your financial situation?
    - iv. Has your household income changed in other ways?
    - v. Have you been able to pay all of your monthly bills?
    - vi. Are there other ways in which you and your family's finances have been affected?
  - d. Finally, please tell me about any other sources of support you had during your pregnancy/have had since giving birth.
6. Is there anything else you would like to share with me about your experience of being pregnant/having a baby during the COVID-19 pandemic?

Thanks so much for taking the time to talk with me. Best wishes on your pregnancy/delivery OR congratulations on your new baby!
