# Supplementary material
Source: MDPI journal article supplement (https://www.mdpi.com/2673-3897/1/2/7)
Supplement: s1 [file s1 › HOPE COVID19 HOPE COVID19 Supplemental Table 1 Prenatal Surveys.pdf]

Supplemental Table 1. Enrollment survey ('E' = enrollment survey, 'S' = subsequent trimester surveys).

**Are you still pregnant? (S)**

- ☐ Yes
- ☐ No

**1a. How did your pregnancy end?**

- ☐ Livebirth
- ☐ Stillbirth
- ☐ Miscarriage
- ☐ Abortion

**1b. When did your pregnancy end (if livebirth, what is your baby's birthdate)?**

MM/DD/YYYY

**1c. Was this an abortion:**

- ☐ By choice
- ☐ Due to maternal or fetal condition,  
What was the maternal or fetal condition? \_\_\_\_\_

**What is your due date? (E, S) MM/DD/YY**

**How many weeks pregnant are you? (E, S) \_\_\_\_\_**

**Section #1**

**1. Race/ethnicity (choose up to 3) (E)**

- ☐ White

Please specify origin for White race/ethnicity checked (select up to three)

- ☐ Europe
- ☐ Middle East
- ☐ North African
- ☐ Other, Please specify other race/ethnicity: \_\_\_\_\_
- ☐ Decline to state
- ☐ Unknown

- ☐ Hispanic

Please specify origin for Hispanic race/ethnicity (select up to three)

- ☐ Mexico
- ☐ Central America
- ☐ South America
- ☐ Puerto Rico
- ☐ Cuba
- ☐ Other, Please specify other race/ethnicity: \_\_\_\_\_
- ☐ Decline to state
- ☐ Unknown

☐ Black or African American

Please specify origin for Black or African American race/ethnicity (select up to three)

- ☐ Jamaica
- ☐ Haiti
- ☐ Nigeria
- ☐ Ethiopia
- ☐ Somalia
- ☐ Other, Please specify other race/ethnicity: \_\_\_\_\_
- ☐ Decline to state
- ☐ Unknown

☐ American Indian or Alaska Native

Please specify origin for American Indian or Alaska Native race/ethnicity (select up to three)

- ☐ Navajo Nation
- ☐ Blackfeet Tribe
- ☐ Mayan
- ☐ Native Village of Barrow Inupiat Traditional Government
- ☐ Other, Please specify other race/ethnicity: \_\_\_\_\_
- ☐ Decline to state
- ☐ Unknown

☐ Asian

Please specify origin for Asian race/ethnicity (select up to three)

- ☐ China
- ☐ Philippines
- ☐ India
- ☐ Vietnam
- ☐ Korea
- ☐ Japan
- ☐ Other, Please specify other race/ethnicity: \_\_\_\_\_
- ☐ Decline to state
- ☐ Unknown

☐ Native Hawaiian or Pacific Islander

Please specify origin for Native Hawaiian or Pacific Islander race/ethnicity (select up to three)

- ☐ Hawaii
- ☐ Samoa
- ☐ Tonga
- ☐ Fiji
- ☐ Guam
- ☐ Other, Please specify other race/ethnicity: \_\_\_\_\_
- ☐ Decline to state
- ☐ Unknown

☐ Other, Please specify other race/ethnicity: \_\_\_\_\_

☐ Decline to state

☐ Unknown

**2. What is your place of birth? (E)**

- ☐ United States      ☐ Mexico  
☐ Canada      ☐ China  
☐ India      ☐ Russia  
☐ Other, Please specify other place of birth: \_\_\_\_\_  
☐ Decline to state

**2a. How long have you lived in the United States? (E)**

- ☐ < 1 year      ☐ 1- 5 years  
☐ 5-10 years      ☐ 10-15 years  
☐ 15-20 years      ☐ 20+ years  
☐ Decline to state

**3. What language do you usually speak at home (check all that are regularly spoken)? (E)**

- ☐ English      ☐ Spanish  
☐ French      ☐ Vietnamese  
☐ Cantonese      ☐ Ukrainian  
☐ Russian      ☐ Arabic  
☐ Other, Please describe other language regularly spoken at home: \_\_\_\_\_  
☐ Decline to state

**4. Relationship status: (E)**

- ☐ Married or living with partner  
☐ Significantly involved, but not living with partner  
☐ Single  
☐ Decline to state

**5. Highest level of completed education: (E)**

- ☐ 8<sup>th</sup> grade or less      ☐ 9<sup>th</sup> through 12<sup>th</sup> grade, no diploma  
☐ High school graduate/ GED completed      ☐ Some college credit, no degree  
☐ Associate degree      ☐ Bachelor's degree  
☐ Master's degree      ☐ Doctorate/ Medical/ Law Degree  
☐ Decline to state

**6. Not counting you, how many people currently live with you? (E)**

- ☐ None      ☐ 1-2  
☐ 3-4      ☐ 5 or more  
☐ Decline to state

**7. Do you currently reside in public funded housing or receive Section 8 housing or housing assistance? (E)**

- ☐ Yes
- ☐ No

**8. What kind of places have you lived in during your pregnancy thus far (check all that apply)? (E)**

- ☐ House/condo that I/my family owns
- ☐ House/condo that I/my family rents
- ☐ Apartment/flat
- ☐ Trailer/mobile home
- ☐ With friends at no cost (couch, floor, extra bedroom)
- ☐ With friends sharing costs
- ☐ Shelter
- ☐ Car/Van
- ☐ On the street or in a tent
- ☐ SRO/Motel/Hotel
- ☐ Other, Please describe the other place you have lived during your pregnancy thus far: \_\_\_\_\_
- ☐ Decline to state

**9. What was your total family income before taxes this past year (including all sources of income – salary, unemployment, other benefits or payments): (E)**

- |                                                 |                                                 |
|-------------------------------------------------|-------------------------------------------------|
| <input type="checkbox"/> \$0 to \$4,999         | <input type="checkbox"/> \$5,000 to \$14,999    |
| <input type="checkbox"/> \$15,000 to \$24,999   | <input type="checkbox"/> \$25,000 to \$39,999   |
| <input type="checkbox"/> \$40,000 to \$49,999   | <input type="checkbox"/> \$50,000 to \$74,999   |
| <input type="checkbox"/> \$75,000 to \$99,999   | <input type="checkbox"/> \$100,000 to \$149,999 |
| <input type="checkbox"/> \$150,000 to \$199,999 | <input type="checkbox"/> \$200,000 or higher    |

**10. Which of the following categories best describes the total income that you and your household received from all sources, before taxes and deductions, in the past month (including salary, unemployment, other benefits or payments)? (E)**

- |                                             |                                             |
|---------------------------------------------|---------------------------------------------|
| <input type="checkbox"/> Less than \$500    | <input type="checkbox"/> \$500 to \$1,000   |
| <input type="checkbox"/> \$1,000 to \$2,000 | <input type="checkbox"/> \$2,000 to \$3,000 |
| <input type="checkbox"/> \$3,000 to \$4,000 | <input type="checkbox"/> Over \$4,000       |

**11. How many people, including you, depend on that income? (E)**

\_\_\_\_ Adults  
\_\_\_\_ Children under 18

**12. In the past year, which one of the following best describes how your income changes from month to month, if at all? (E)**

- ☐ Roughly the same amount each month
- ☐ Roughly the same most months, but some unusually high or low months during the year
- ☐ Often varies quite a bit from one month to the next

**13. During the next 12 months, do you expect your total household income to be higher, about the same, or lower than during the past 12 months? (E)**

- ☐ Higher
- ☐ About the same
- ☐ Lower

**13a. If you expect that your family will earn less this year than last, what is the reason for this? (check all that apply) (E)**

- ☐ Taking time off for the birth
- ☐ I lost my job/ my hours were cut
- ☐ Someone else in my family lost their job/ hours were cut
- ☐ Other

**14. Overall, which one of the following best describes how well you are managing financially these days: (E, S)**

- ☐ Living comfortably
- ☐ Doing okay
- ☐ Just getting by
- ☐ Finding it difficult to get by

**15. Compared to 12 months ago, would you say that you (and your family living with you) are better off, the same, or worse off financially? (E, S)**

- ☐ Much better off
- ☐ Somewhat better off
- ☐ About the same
- ☐ Somewhat worse off
- ☐ Much worse off

**16. Based on your current financial situation, what is the largest emergency expense that you could pay right now using cash or money in your checking/savings account? (E, S)**

- ☐ Under \$50
- ☐ \$50-\$99
- ☐ \$100 to \$199
- ☐ \$200 to \$299
- ☐ \$300 to \$399
- ☐ Over \$400

**17. How many hours do you work a week at your job or jobs? (E, S)**

- ☐ None
- ☐ < 20 hours
- ☐ 20-40 hours
- ☐ More than 40 hours

**17a. During your pregnancy have you had to regularly do any of the following as a requirement of your job (check all that apply)? (E, S)**

- ☐ Stand for more than 3 hours in a row
- ☐ Work around smoke or exhaust fumes
- ☐ Lift or carry more than 25 pounds
- ☐ Use chemicals like cleaning products
- ☐ Work a night shift more than once a week
- ☐ Bend or stoop multiple times a day
- ☐ None

**17b. When do you expect to stop working in anticipation of your delivery? (E, S)**

- ☐ Not able to stop working/unable to take leave
- ☐ Plan to work until go into labor
- ☐ < 1 week before your expected due date
- ☐ 1 week to one month before your expected due date
- ☐ > 1 month before your expected due date
- ☐ 1 week to one month before your expected due date
- ☐ Unknown

**17c. When do you expect to return to work after your delivery? (E, S)**

- ☐ < 3-weeks
- ☐ 6-weeks
- ☐ 7-weeks to 3 months
- ☐ > 3 months
- ☐ Not planning on working
- ☐ Unknown

**Section #2**

**1. Adverse Childhood Experiences Revised Questionnaire (E)**

Modifications to Adverse Childhood Experiences Revised Questionnaire.

**1a. To what degree do you believe that the childhood experiences described in #1 above have affected your physical or mental health since they happened? (E)**

- ☐ Not much
- ☐ Some
- ☐ A lot

Modifications to Philadelphia Expanded Adverse Childhood Experiences Revised Questionnaire.

**2. Please answer the following questions as they relate to your experiences before 18-years of age.**

|                                                                                                                                      | Most of the time         | Some of the time         | Rarely                   | Never                    |
|--------------------------------------------------------------------------------------------------------------------------------------|--------------------------|--------------------------|--------------------------|--------------------------|
| Did you feel safe in your neighborhood while growing up?                                                                             | <input type="checkbox"/> | <input type="checkbox"/> | <input type="checkbox"/> | <input type="checkbox"/> |
| Did you feel people in your neighborhood looked out for each other, stood up for each other, and could be trusted?                   | <input type="checkbox"/> | <input type="checkbox"/> | <input type="checkbox"/> | <input type="checkbox"/> |
| How often, if ever did you see or hear about someone being beaten up, stabbed, or shot in real life?                                 | <input type="checkbox"/> | <input type="checkbox"/> | <input type="checkbox"/> | <input type="checkbox"/> |
| While growing up, how often did you feel that you were being treated badly or unfairly because of your race or ethnicity?            | <input type="checkbox"/> | <input type="checkbox"/> | <input type="checkbox"/> | <input type="checkbox"/> |
| While growing up, how often did you feel that you were being treated badly or unfairly because of your gender or sexual orientation? | <input type="checkbox"/> | <input type="checkbox"/> | <input type="checkbox"/> | <input type="checkbox"/> |
| How often were you bullied by a peer or classmate?                                                                                   | <input type="checkbox"/> | <input type="checkbox"/> | <input type="checkbox"/> | <input type="checkbox"/> |
| Were you ever in foster care?                                                                                                        | <input type="checkbox"/> | <input type="checkbox"/> | <input type="checkbox"/> | <input type="checkbox"/> |

**2a. To what degree do you believe that the other childhood experiences described in question #4 above have affected your physical or mental health since it/they happened? (E)**

- ☐ Not much

- ☐ Some
- ☐ A lot

### **Section #3**

**1. How many times have you been pregnant previously? (E) \_\_\_\_\_**

**1a. How many of your previous pregnancies ended in live birth? (E) \_\_\_\_\_**

**1b. How many of your previous pregnancies did not end in live birth? (E) \_\_\_\_\_**

**1c. Please complete the following as it relates to any pregnancies not ending in live birth.**

**Pregnancy end date: MM/DD/YY (E)**

**How many weeks gestation were you when this pregnancy ended? (E)**

- ☐ < 20
- ☐ 20 or more
- ☐ Unknown

**Was this: (E)**

- ☐ An abortion by choice
- ☐ An abortion because of a condition
- ☐ Miscarriage
- ☐ Stillbirth
- ☐ Decline to state

**1d. What is the date of your last live birth? (E) MM/DD/YY**

**1e. Was your last child born prematurely (before 37 weeks or 3 or more weeks before your expected due date)? (E)**

- ☐ Yes
- ☐ No
- ☐ Do not know

**1f. Did your last child spend more than 7-days in the hospital right after birth? (E)**

- ☐ Yes
- ☐ No

Do you know the reason for his/her longer stay in the hospital?

- ☐ Yes
- ☐ No

Please provide the reason for his/her longer stay in the hospital \_\_\_\_\_

**1g. Were any of your other children born prematurely (before 37 weeks or 3 or more weeks before your expected due date)? (E)**

- ☐ Yes

- ☐ No
- ☐ Do not know

**1h. Did any of your previously liveborn children spend more than 7-days in the hospital right after birth? (E)**

- ☐ Yes, What was the reason for his/her/their longer stay(s) in the hospital? \_\_\_\_\_
- ☐ No

**1i. Were any of your previous children born with any kind of genetic or physical abnormality (for example Down Syndrome or a heart defect) (E)**

- ☐ Yes, What was the type of genetic or physical abnormality \_\_\_\_\_
- ☐ No

**1j. Have you experienced any of the following in previous pregnancies (check all that apply) (E)**

- ☐ Gestational diabetes
- ☐ Gestational hypertension (high blood pressure)
- ☐ Preeclampsia (generally diagnosed as very high blood pressure and some risk of having a seizure)
- ☐ Too much amniotic fluid (polyhydramnios)
- ☐ Too little amniotic fluid (oligohydramnios)
- ☐ Problems with your placenta (placental previa, placental abruption, placental accreta)  
Please explain the problem with your placenta: \_\_\_\_\_
- ☐ Early (premature) rupture of the membranes (leaking of amniotic fluid 3 weeks or more before your expected due date)
- ☐ Early contractions/labor pains (3 weeks or more before your expected due date)
- ☐ Cesarean delivery (C-section)

**2. Were any of the following diagnosed or present in the 3-months prior to your current pregnancy? Skip if does not apply. (E)**

|                                                           | Yes                      | No                       |
|-----------------------------------------------------------|--------------------------|--------------------------|
| Type I Diabetes                                           | <input type="checkbox"/> | <input type="checkbox"/> |
| Type II Diabetes                                          | <input type="checkbox"/> | <input type="checkbox"/> |
| Hypertension/ High Blood Pressure                         | <input type="checkbox"/> | <input type="checkbox"/> |
| Asthma                                                    | <input type="checkbox"/> | <input type="checkbox"/> |
| Anemia (not sickle cell)                                  | <input type="checkbox"/> | <input type="checkbox"/> |
| Sickle cell anemia                                        | <input type="checkbox"/> | <input type="checkbox"/> |
| Insomnia                                                  | <input type="checkbox"/> | <input type="checkbox"/> |
| Sleep Apnea                                               | <input type="checkbox"/> | <input type="checkbox"/> |
| Allergies,<br>Please describe: _____                      | <input type="checkbox"/> | <input type="checkbox"/> |
| Anxiety Disorder                                          | <input type="checkbox"/> | <input type="checkbox"/> |
| Depression                                                | <input type="checkbox"/> | <input type="checkbox"/> |
| Other diagnosed mental illness,<br>Please describe: _____ | <input type="checkbox"/> | <input type="checkbox"/> |
| Urinary Tract Infection                                   | <input type="checkbox"/> | <input type="checkbox"/> |
| Other Infection,<br>Please describe: _____                | <input type="checkbox"/> | <input type="checkbox"/> |
| Other Medical Condition(s),<br>Please describe: _____     | <input type="checkbox"/> | <input type="checkbox"/> |

**3. In the three months prior to your current pregnancy, did you take any prescription medication? (E)**

☐ Yes

☐ No

How many medications did you take (provide space for up to 5)?

What is the name of medication #1?

Why did you take medication #1?

What are the approximate dates of use (if currently taking, do not enter end date)?

Start: MMDDYYYY End: MMDDYYYY

If you took additional medications, please describe: \_\_\_\_\_

**4. In the three months before becoming pregnant did you take or use any of the following\*? (E)**

*\*Reminder: All information is confidential and will not be shared with anyone outside of the study or be stored in the same computer location or file with your identifying information (name, birth date, address, email address, phone number).*

|                                                                                                                      | Yes                      | No                       | How often?                                                                                                                                               | How many?                                                                                          |
|----------------------------------------------------------------------------------------------------------------------|--------------------------|--------------------------|----------------------------------------------------------------------------------------------------------------------------------------------------------|----------------------------------------------------------------------------------------------------|
| Tobacco/cigarettes or vaping                                                                                         | <input type="checkbox"/> | <input type="checkbox"/> | <input type="checkbox"/> Daily<br><input type="checkbox"/> Weekly<br><input type="checkbox"/> Monthly<br><input type="checkbox"/> Less than once a month | <input type="checkbox"/> 1<br><input type="checkbox"/> 2 – 4<br><input type="checkbox"/> 5 or more |
| Alcohol                                                                                                              | <input type="checkbox"/> | <input type="checkbox"/> | <input type="checkbox"/> Daily<br><input type="checkbox"/> Weekly<br><input type="checkbox"/> Monthly<br><input type="checkbox"/> Less than once a month | <input type="checkbox"/> 1<br><input type="checkbox"/> 2 – 4<br><input type="checkbox"/> 5 or more |
| Smoke Marijuana (e.g. pot, weed)                                                                                     | <input type="checkbox"/> | <input type="checkbox"/> | <input type="checkbox"/> Daily<br><input type="checkbox"/> Weekly<br><input type="checkbox"/> Monthly<br><input type="checkbox"/> Less than once a month | <input type="checkbox"/> 1<br><input type="checkbox"/> 2 – 4<br><input type="checkbox"/> 5 or more |
| Used marijuana (e.g. THC, CBD, edibles. Please do not include lotions, creams, or gels)                              | <input type="checkbox"/> | <input type="checkbox"/> | <input type="checkbox"/> Daily<br><input type="checkbox"/> Weekly<br><input type="checkbox"/> Monthly<br><input type="checkbox"/> Less than once a month | <input type="checkbox"/> 1<br><input type="checkbox"/> 2 – 4<br><input type="checkbox"/> 5 or more |
| Other Street Drug(s) (e.g. cocaine, methamphetamine, heroin, unprescribed pain killers, other),<br>What type?: _____ | <input type="checkbox"/> | <input type="checkbox"/> | <input type="checkbox"/> Daily<br><input type="checkbox"/> Weekly<br><input type="checkbox"/> Monthly<br><input type="checkbox"/> Less than once a month | <input type="checkbox"/> 1<br><input type="checkbox"/> 2 – 4<br><input type="checkbox"/> 5 or more |

**5. How tall are you? (E) \_\_\_\_ Feet \_\_\_\_ inches**

**6. How much did you weigh right before becoming pregnant? (E) \_\_\_\_ pounds**

**7. On average, during the three months before you got pregnant, how many days a week did you exercise for at least twenty-minutes (hard enough to cause heavy breathing) (E) \_\_\_\_ days**

**8. On average, during the three months before you got pregnant, how many nights a week did you get at least 7-hours of sleep? (E) \_\_\_\_ nights**

#### **Section #4**

**1. Please describe your current healthcare/prenatal care insurance coverage: (E, S)**

- ☐ MediCal/Medicaid
- ☐ City provided healthcare (e.g. Healthy San Francisco)
- ☐ Private Insurance (e.g. Blue Cross, Anthem, Sutter, Kaiser)
- ☐ TRICARE (military insurance)
- ☐ Other, Please list the type of healthcare/prenatal care insurance coverage: \_\_\_\_\_
- ☐ None

**2. Do you have a current doctor or clinic that you usually go to for prenatal care? (E, S)**

- ☐ Yes
- ☐ No

**2a. Do you participate in group prenatal care? (E, S)**

- ☐ Yes
- ☐ No

**2b. In general do you trust your prenatal care provider? (E, S)**

- ☐ Rarely/never
- ☐ Sometimes
- ☐ Most of the time
- ☐ Always

**2c. Overall how happy/satisfied are you with the prenatal care you receive? (E, S)**

- ☐ Not at all happy/not at all satisfied
- ☐ Somewhat happy/satisfied
- ☐ Neutral/no opinion
- ☐ Somewhat happy/satisfied
- ☐ Satisfied

**2d. How likely are you to refer your prenatal care provider to your close friends, coworker, or family member? (E, S)**

- ☐ Not at all likely
- ☐ Somewhat unlikely
- ☐ Neutral/no opinion
- ☐ Somewhat likely
- ☐ Very likely

**2e. When did you have your first prenatal care appointment (if you don't know the exact date, please approximate)? (E) MMDDYYYY**

**2f. How many prenatal care appointments have you attended since becoming pregnant (including your first appointment)? (E, S) \_\_\_\_**

#### **Section #5**

**1. Did you receive treatment from a care provider to get pregnant (have infertility treatment)? (E)**

- ☐ Yes
- ☐ No

**1a. What type of treatment to get pregnant did you receive? (E)**

- ☐ Intrauterine insemination (IUI)
- ☐ In vitro fertilization (IVF)
- ☐ Other, What type of infertility treatment did you receive? \_\_\_\_\_

**2. Were you breastfeeding one of your other children when you got pregnant? (E)**

- ☐ Yes
- ☐ No

**3. Were you using any birth control when you got pregnant? (E)**

- ☐ Yes
- ☐ No

**3a. What type of birth control were you using when you got pregnant? (E)**

- ☐ Condom
- ☐ IUD
- ☐ Depo-Provera (shot)
- ☐ Oral contraceptive pill (the pill)
- ☐ Nuva Ring
- ☐ Patch
- ☐ Implant under the skin
- ☐ Withdrawal
- ☐ Other, What other type of birth control were you using: \_\_\_\_\_

**4. Thinking back to just before you got pregnant, how did you feel about getting pregnant? (E)**

- ☐ I wanted to get pregnant then
- ☐ I wanted to get pregnant later
- ☐ I didn't want to get pregnant then or in the future
- ☐ I wasn't sure what I wanted

**5. Before you got pregnant, did you typically get a period every month? (E)**

- ☐ Yes
- ☐ No

**6. Do you know the approximate date of your first ultrasound? (E, S)**

- ☐ Yes,

What is the date of your first ultrasound (if you don't know the exact date, please approximate)?  
MMDDYY

- ☐ No
- ☐ I have not had an ultrasound

**7. During your pregnancy so far, would you say that your health has been usually: (E)**

- ☐ Excellent
- ☐ Very Good
- ☐ Good
- ☐ Fair
- ☐ Poor

**8. What is your current weight: (E, S) \_\_\_\_ pounds**

**9. Over the past month, on average, how many days a week have you exercised for at least twenty-minutes (hard enough to cause heavy breathing) since becoming pregnant? (E, S) \_\_\_\_ days**

**10. Over the past month, on average how many nights a week do you get at least 7-hours of sleep? (E, S) \_\_\_\_ nights**

**11. Have any of the following been newly diagnosed SINCE becoming pregnant? (E, S)**

|                                                                                                                   | Yes                      | No                       |
|-------------------------------------------------------------------------------------------------------------------|--------------------------|--------------------------|
| Gestational Diabetes                                                                                              | <input type="checkbox"/> | <input type="checkbox"/> |
| Gestational Hypertension/ High Blood Pressure                                                                     | <input type="checkbox"/> | <input type="checkbox"/> |
| Preeclampsia (generally diagnosed as very high blood pressure and some risk of having a seizure)                  | <input type="checkbox"/> | <input type="checkbox"/> |
| Too much amniotic fluid (polyhydramnios)                                                                          | <input type="checkbox"/> | <input type="checkbox"/> |
| Too little amniotic fluid (oligohydramnios)                                                                       | <input type="checkbox"/> | <input type="checkbox"/> |
| Problems with your placenta (placental previa, placental abruption, placental accreta),<br>Please describe: _____ | <input type="checkbox"/> | <input type="checkbox"/> |
| Early (premature) rupture of the membranes (3 weeks or more before your expected due date (if known))             | <input type="checkbox"/> | <input type="checkbox"/> |
| Early contractions/labor pains (3 weeks or more before your expected due date)                                    | <input type="checkbox"/> | <input type="checkbox"/> |
| Asthma                                                                                                            | <input type="checkbox"/> | <input type="checkbox"/> |
| Anemia (not sickle cell)                                                                                          | <input type="checkbox"/> | <input type="checkbox"/> |
| Sickle cell anemia                                                                                                |                          |                          |
| Insomnia                                                                                                          | <input type="checkbox"/> | <input type="checkbox"/> |
| Sleep Apnea                                                                                                       | <input type="checkbox"/> | <input type="checkbox"/> |
| Allergies,<br>Please describe: _____                                                                              | <input type="checkbox"/> | <input type="checkbox"/> |
| Anxiety Disorder                                                                                                  | <input type="checkbox"/> | <input type="checkbox"/> |
| Depression                                                                                                        | <input type="checkbox"/> | <input type="checkbox"/> |
| Other diagnosed mental illness,<br>Please describe: _____                                                         | <input type="checkbox"/> | <input type="checkbox"/> |
| Urinary Tract Infection                                                                                           | <input type="checkbox"/> | <input type="checkbox"/> |
| Other Infection,<br>Please describe: _____                                                                        | <input type="checkbox"/> | <input type="checkbox"/> |
| Other Medical Condition(s),<br>Please describe: _____                                                             | <input type="checkbox"/> | <input type="checkbox"/> |

**12. Since becoming pregnant have you taken any prescription medication? (E, S)**

☐ Yes

☐ No

How many prescription medications do you currently take (provide up to 5)?

What is the name of prescription medication #1?

Why did you take prescription medication #1?

What are the approximate dates of use of prescription medication #1 (if currently taking, do not enter end date)?

Start: MMDDYYYY End: MMDDYYYY

If you took additional medications, please describe: \_\_\_\_\_

**13. Since becoming pregnant, have you taken any over the counter medication (do not include vitamins or herbal supplements)? (E, S)**

- ☐ Yes  
☐ No

**13a. Did your prenatal provider or anyone else suggest that you take baby aspirin at any time during pregnancy? (E, S)**

- ☐ Yes  
☐ No

**What was the reason for the recommendation to take baby aspirin? (E, S)** \_\_\_\_\_

**Are you currently taking baby aspirin? (E, S)**

- ☐ Yes  
☐ No

**How often do you take baby aspirin? (E, S)**

- ☐ Daily  
☐ Sometimes but not daily

**When did you begin taking aspirin? (E, S)**

- ☐ Prior to pregnancy  
☐ Between 3 to 4 months (12 to 15 weeks) of your pregnancy  
☐ After 3 to 4 months (12 to 15 weeks) of your pregnancy  
☐ I don't remember

**13b. What type of other over the counter medications are you taking (check all that apply)? (E, S)**

|                                                              | Yes                      | No                       | Start date | End date |
|--------------------------------------------------------------|--------------------------|--------------------------|------------|----------|
| Tylenol                                                      | <input type="checkbox"/> | <input type="checkbox"/> |            |          |
| Other pain reliever                                          | <input type="checkbox"/> | <input type="checkbox"/> |            |          |
| Allergy medication                                           | <input type="checkbox"/> | <input type="checkbox"/> |            |          |
| Cough medication                                             | <input type="checkbox"/> | <input type="checkbox"/> |            |          |
| Other over the counter medication,<br>Please describe: _____ | <input type="checkbox"/> | <input type="checkbox"/> |            |          |

**14. Since becoming pregnant, have you taken or use any of the following\*? (E, S)**

*\*Reminder: All information is confidential and will not be shared with anyone outside of the study or be stored in the same computer location or file with your identifying information (name, birth date, address, email address, phone number).*

|                              | Yes                      | No                       | How often?                                                                                            | How many?                                                                                          |
|------------------------------|--------------------------|--------------------------|-------------------------------------------------------------------------------------------------------|----------------------------------------------------------------------------------------------------|
| Tobacco/cigarettes or vaping | <input type="checkbox"/> | <input type="checkbox"/> | <input type="checkbox"/> Daily<br><input type="checkbox"/> Weekly<br><input type="checkbox"/> Monthly | <input type="checkbox"/> 1<br><input type="checkbox"/> 2 – 4<br><input type="checkbox"/> 5 or more |

|                                                                                                                      |                          |                          |                                                                                                                                                          |                                                                                                    |
|----------------------------------------------------------------------------------------------------------------------|--------------------------|--------------------------|----------------------------------------------------------------------------------------------------------------------------------------------------------|----------------------------------------------------------------------------------------------------|
|                                                                                                                      |                          |                          | <input type="checkbox"/> Less than once a month                                                                                                          |                                                                                                    |
| Alcohol                                                                                                              | <input type="checkbox"/> | <input type="checkbox"/> | <input type="checkbox"/> Daily<br><input type="checkbox"/> Weekly<br><input type="checkbox"/> Monthly<br><input type="checkbox"/> Less than once a month | <input type="checkbox"/> 1<br><input type="checkbox"/> 2 – 4<br><input type="checkbox"/> 5 or more |
| Smoke Marijuana (e.g. pot, weed)                                                                                     | <input type="checkbox"/> | <input type="checkbox"/> | <input type="checkbox"/> Daily<br><input type="checkbox"/> Weekly<br><input type="checkbox"/> Monthly<br><input type="checkbox"/> Less than once a month | <input type="checkbox"/> 1<br><input type="checkbox"/> 2 – 4<br><input type="checkbox"/> 5 or more |
| Used marijuana (e.g. THC, CBD, edibles. Please do not include lotions, creams, or gels)                              | <input type="checkbox"/> | <input type="checkbox"/> | <input type="checkbox"/> Daily<br><input type="checkbox"/> Weekly<br><input type="checkbox"/> Monthly<br><input type="checkbox"/> Less than once a month | <input type="checkbox"/> 1<br><input type="checkbox"/> 2 – 4<br><input type="checkbox"/> 5 or more |
| Other Street Drug(s) (e.g. cocaine, methamphetamine, heroin, unprescribed pain killers, other),<br>What type?: _____ | <input type="checkbox"/> | <input type="checkbox"/> | <input type="checkbox"/> Daily<br><input type="checkbox"/> Weekly<br><input type="checkbox"/> Monthly<br><input type="checkbox"/> Less than once a month | <input type="checkbox"/> 1<br><input type="checkbox"/> 2 – 4<br><input type="checkbox"/> 5 or more |

**15. Does any other person in your home use tobacco? (E, S)**

- ☐ Yes  
☐ No

**16. Does any other person in your home smoke marijuana (e.g. pot, weed)? (E, S)**

- ☐ Yes  
☐ No

**17. Does any other person in your home use other forms of marijuana (e.g. THC, CBD, edibles. Please do not include lotions, creams, or gels)? (E, S)**

- ☐ Yes  
☐ No

**18. Does any other person in your home use a street drug (e.g. cocaine, methamphetamine, heroin, unprescribed pain killers, other) (E, S)**

- ☐ Yes, What type of street drug is used in your home? \_\_\_\_\_  
☐ No

**19. Have you been receiving progesterone shots or any other treatments to prevent preterm labor? (E, S)**

- ☐ Yes  
☐ No

Have you been receiving (check all that apply):

- ☐ Progesterone shots  
☐ Other treatment(s) to prevent preterm labor, please describe: \_\_\_\_\_

**Section #6**

Modifications to: Promoting Food Security for All Children. (Questions 1 and 2)

**1. During your pregnancy to this point, how often was the following statement true: “We worried whether our food would run out before we got money to buy more.” (E, S)**

- ☐ Often true
- ☐ Sometimes true
- ☐ Never true

**2. During your pregnancy to this point, how often was the following statement true: “The food we bought just didn’t last, and we didn’t have money to get more.” (E, S)**

- ☐ Often true
- ☐ Sometimes true
- ☐ Never true

**3. During your pregnancy to this point, how often was the following statement true: “We worried whether our medicine would run out before we got money to buy more.” (E, S)**

- ☐ Often true
- ☐ Sometimes true
- ☐ Never true

**4. During your pregnancy to this point, how often was the following statement true: “The medicine we bought just didn’t last, and we didn’t have money to get more.” (E, S)**

- ☐ Often true
- ☐ Sometimes true
- ☐ Never true

**5. During your pregnancy to this point, how often was the following statement true: “My family and I worried about where we would sleep for the following month or about losing our housing.” (E, S)**

- ☐ Often true
- ☐ Sometimes true
- ☐ Never true

**6. Here are a few things that might happen to some people or their partners during pregnancy. Have any of these things happened to you during this pregnancy (Check all that apply)? (E, S)**

- ☐ I got separated or divorced from my partner
- ☐ My partner or I were arrested or went to jail
- ☐ Someone very close to me had a problem with drinking or drugs
- ☐ A close family member was very sick and had to go to the hospital
- ☐ I argued with my spouse or partner more than usual
- ☐ I was physically hurt by my spouse, partner or a family member
- ☐ I physically hurt my spouse, partner or a family member
- ☐ I was in a physical fight
- ☐ A close family member or friend was shot and killed by police.
- ☐ A close family member or friend was shot and killed by someone other than the police.

**7. Everyday Discrimination Scale (short version) (E, S)**

Modification to: Everyday Discrimination Scale (short version) (question #7a)

**7a. What do you think the main reasons are for these experiences (check all that apply)? (E, S)**

- ☐ Xenophobia
- ☐ Gender oppression

- ☐ Racism
- ☐ Ageism (older folks)
- ☐ Adulthood (younger folks)
- ☐ Fat phobia
- ☐ Sexism
- ☐ Homo/trans phobia
- ☐ Class exploitation
- ☐ Colorism
- ☐ Tribalism
- ☐ Other, What other reason do you think for these experiences? \_\_\_\_\_

**8. During pregnancy how satisfied have you been with the support given to you by the baby's father? (E, S)**

- ☐ Not at all satisfied
- ☐ Somewhat dissatisfied
- ☐ Somewhat satisfied
- ☐ Very satisfied
- ☐ Does not apply/ decline to state

**9. Satisfaction With Life Scale (E, S)**

**10. Please list three things you enjoy doing to feel relaxed and feel good. (E, S)**

- #1 \_\_\_\_\_
- #2 \_\_\_\_\_
- #3 \_\_\_\_\_

**11. Currently, how many times a week are you able to do at least one of these things? (E, S)**

- ☐ More than 5 times a week
- ☐ 2 to 4 times a week
- ☐ 1 time a week
- ☐ < 1 time a week

**12. Do you have any additional thoughts you would like to share with us about how satisfied you are or are not with your life and your ability to do the things you like to do to relax and feel good? (E, S) \_\_\_\_\_**

**13. Generalized Anxiety Disorder 7-item (GAD-7) scale (E, S)**

**13a. Do you have any additional thoughts you would like to share with us about any stress you are currently experiencing related to general life stressors? (E, S) \_\_\_\_\_**

**14. Perceived Stress Scale 4 (PSS-4) (E, S)**

**15. Do you have any additional thoughts you would like to share with us about any anxiety or fear you are currently experiencing related to your labor, delivery, or baby health? If so, please provide them in the box below. (E, S) \_\_\_\_\_**

**16. Pregnancy-Related Anxiety Scale (E, S)**

**17. Do you have any additional thoughts you would like to share with us about your current feelings of social connectedness? If so, please provide them in the box below. (E, S) \_\_\_\_\_**

**18. UCLA Loneliness Scale (E, S)**

**19. Do you have any additional thoughts you would like to share with us about your current feelings of social connectedness? If so, please provide them in the box below. (E, S)**

**20. Since becoming pregnant have you received any of the following services or information? Please check all that apply. (E, S)**

|                                                                                                     | Yes                      | No                       |
|-----------------------------------------------------------------------------------------------------|--------------------------|--------------------------|
| A class or classes to prepare for childbirth or parenting                                           | <input type="checkbox"/> | <input type="checkbox"/> |
| A home visit to prepare for the new baby                                                            | <input type="checkbox"/> | <input type="checkbox"/> |
| Information, education, or support on infant feeding, lactation, donor human milk                   | <input type="checkbox"/> | <input type="checkbox"/> |
| Counseling for personal or family problems or for stress, depression, anxiety or any mental illness | <input type="checkbox"/> | <input type="checkbox"/> |
| Help from a social worker in the community, in a clinic or in the hospital                          | <input type="checkbox"/> | <input type="checkbox"/> |
| Help with stopping smoking                                                                          | <input type="checkbox"/> | <input type="checkbox"/> |
| Help with an alcohol or drug problem                                                                | <input type="checkbox"/> | <input type="checkbox"/> |
| Help to reduce violence in my home                                                                  | <input type="checkbox"/> | <input type="checkbox"/> |
| Reduce violence in health care, in society, at work, in my community                                | <input type="checkbox"/> | <input type="checkbox"/> |
| Mental health support for my worry, fear, anxiety, frustration, anger, stress, or sadness           | <input type="checkbox"/> | <input type="checkbox"/> |
| Help from a lawyer or Legal Aid                                                                     | <input type="checkbox"/> | <input type="checkbox"/> |
| Financial help (money)                                                                              | <input type="checkbox"/> | <input type="checkbox"/> |
| Housing assistance (money or placement)                                                             | <input type="checkbox"/> | <input type="checkbox"/> |
| Food assistance (food or money from a food bank, shelter, WIC or food stamps)                       | <input type="checkbox"/> | <input type="checkbox"/> |
| Help or assistance from my church                                                                   | <input type="checkbox"/> | <input type="checkbox"/> |
| Help from the Black Infant Health Program or other similar state or local program                   | <input type="checkbox"/> | <input type="checkbox"/> |
| Doula support to help me through my pregnancy and to prepare for birth of my baby                   | <input type="checkbox"/> | <input type="checkbox"/> |

**21. Interpersonal Support Evaluation List (E, S)**

**22. Do you have any additional thoughts you would like to share with us about your current feelings about interpersonal support from family or friends? (E, S)** \_\_\_\_\_

**23. The Brief Resilience Scale (E, S)**

**24. The Connor-Davidson 10-item Resilience Scale (CD-RISC-10) (E, S)**

**25. Do you have any additional thoughts you would like to share with us about your current feelings about how you deal with hard times, stressful events, and set-backs? (E, S)** \_\_\_\_\_

**Section #7**

**1. Have you had and SARS-COV-2/ or COVID-19 testing since the start of the pandemic? (E, S)**

- ☐ Yes  
☐ No

**How many tests have you had? (E, S)** \_\_\_\_\_

**What were the dates of the tests (please approximate if you don't know the exact date) (provide up to 10)? (E, S)**

Test #1 MMYYYY

Test #2 MMYYYY

Test #3 MMYYYY

**What type of test(s) have you had? (check all that apply) (E, S)**

- ☐ Testing using a nasal swab for the actual virus
- ☐ Antibody testing using a blood test
- ☐ I had testing but not sure what type of testing

**What was (were) the result of your testing (check all that apply) (E, S)**

- ☐ Positive
- ☐ Negative
- ☐ Not sure

**Did you have symptoms? (E, S)**

- ☐ Yes
- ☐ No

**When did you symptoms begin (if you don't remember the exact date, please approximate)? (E, S)**  
MMYYYY

**Please check any of the following symptoms you experienced: (E, S)**

|                                                                                      | Yes                      | No                       | Start date | End date |
|--------------------------------------------------------------------------------------|--------------------------|--------------------------|------------|----------|
| Fever >100.4F (38C)c                                                                 | <input type="checkbox"/> | <input type="checkbox"/> |            |          |
| Subjective fever (felt feverish)                                                     | <input type="checkbox"/> | <input type="checkbox"/> |            |          |
| Chills                                                                               | <input type="checkbox"/> | <input type="checkbox"/> |            |          |
| Repeated shaking with chills                                                         | <input type="checkbox"/> | <input type="checkbox"/> |            |          |
| Muscle aches (myalgia)                                                               | <input type="checkbox"/> | <input type="checkbox"/> |            |          |
| Runny nose (rhinorrhea)                                                              | <input type="checkbox"/> | <input type="checkbox"/> |            |          |
| Sore throat                                                                          | <input type="checkbox"/> | <input type="checkbox"/> |            |          |
| Cough (new onset or worsening of chronic cough)                                      | <input type="checkbox"/> | <input type="checkbox"/> |            |          |
| Shortness of breath (dyspnea)                                                        | <input type="checkbox"/> | <input type="checkbox"/> |            |          |
| Nausea or vomiting                                                                   | <input type="checkbox"/> | <input type="checkbox"/> |            |          |
| Headache                                                                             | <input type="checkbox"/> | <input type="checkbox"/> |            |          |
| Ageusia (loss of taste)                                                              | <input type="checkbox"/> | <input type="checkbox"/> |            |          |
| Anosia (loss of smell)                                                               | <input type="checkbox"/> | <input type="checkbox"/> |            |          |
| Abdominal pain                                                                       | <input type="checkbox"/> | <input type="checkbox"/> |            |          |
| Diarrhea (≥3 loose/looser than normal stools/24hr period)                            | <input type="checkbox"/> | <input type="checkbox"/> |            |          |
| Pneumonia                                                                            | <input type="checkbox"/> | <input type="checkbox"/> |            |          |
| Acute respiratory distress syndrome                                                  | <input type="checkbox"/> | <input type="checkbox"/> |            |          |
| Neurological symptoms,<br>What type of neurologic symptoms did you experience? _____ | <input type="checkbox"/> | <input type="checkbox"/> |            |          |
| Other,<br>What type of other symptoms did you experience? _____                      | <input type="checkbox"/> | <input type="checkbox"/> |            |          |

**Did you have an abnormal chest X-ray? (E, S)**

- ☐ Yes
- ☐ No
- ☐ Unknown

**Were you hospitalized? (E, S)**

- ☐ Yes
- ☐ No, What other medical care did you receive related to your infection? \_\_\_\_\_

**What day were you admitted to the hospital (if you don't remember, please approximate) (E, S)**

MMDDYY

**What day were you discharged from the hospital (if you don't remember, please approximate) (E, S) MMDDYY**

**Were you admitted to an intensive care unit (ICU)? (E, S)**

- ☐ Yes
- ☐ No
- ☐ Unknown

**Did you receive mechanical ventilation/intubation? (E, S)**

- ☐ Yes, How many days you were on mechanical ventilation/intubation? \_\_\_\_
- ☐ No
- ☐ Unknown

**Do you have any additional thoughts you would like to share with us about your experience with testing positive for SARS-COV-2/COVID-19 and about your related illness and treatment? (E, S)**

\_\_\_\_\_

**2. Has anyone in your immediate family/ person living in your household been diagnosed with SARS-COV-2 or COVID-19 since the start of the pandemic? (E, S)**

- ☐ Yes
- ☐ No

**What relationship to you is this person? (E, S)**

\*If more than one person was diagnosed you will be able to enter other records after this current record.

- ☐ Spouse/ partner
- ☐ Child
- ☐ Parent
- ☐ Other, Please describe the relationship with the other person: \_\_\_\_\_

**What was the approximate date of first their positive test (E, S) MMDDYYYY**

**Did he/she have symptoms? (E, S)**

- ☐ Yes  
☐ No

**When did the symptoms begin (if you don't remember the exact date, please approximate)?**  
**(E, S) MMYYYY**

**Please check any of the following symptoms that this person experienced: (E, S)**

|                                                                                      | Yes                      | No                       | Start date | End date |
|--------------------------------------------------------------------------------------|--------------------------|--------------------------|------------|----------|
| Fever >100.4F (38C)c                                                                 | <input type="checkbox"/> | <input type="checkbox"/> |            |          |
| Subjective fever (felt feverish)                                                     | <input type="checkbox"/> | <input type="checkbox"/> |            |          |
| Chills                                                                               | <input type="checkbox"/> | <input type="checkbox"/> |            |          |
| Repeated shaking with chills                                                         | <input type="checkbox"/> | <input type="checkbox"/> |            |          |
| Muscle aches (myalgia)                                                               | <input type="checkbox"/> | <input type="checkbox"/> |            |          |
| Runny nose (rhinorrhea)                                                              | <input type="checkbox"/> | <input type="checkbox"/> |            |          |
| Sore throat                                                                          | <input type="checkbox"/> | <input type="checkbox"/> |            |          |
| Cough (new onset or worsening of chronic cough)                                      | <input type="checkbox"/> | <input type="checkbox"/> |            |          |
| Shortness of breath (dyspnea)                                                        | <input type="checkbox"/> | <input type="checkbox"/> |            |          |
| Nausea or vomiting                                                                   | <input type="checkbox"/> | <input type="checkbox"/> |            |          |
| Headache                                                                             | <input type="checkbox"/> | <input type="checkbox"/> |            |          |
| Ageusia (loss of taste)                                                              | <input type="checkbox"/> | <input type="checkbox"/> |            |          |
| Anosia (loss of smell)                                                               | <input type="checkbox"/> | <input type="checkbox"/> |            |          |
| Abdominal pain                                                                       | <input type="checkbox"/> | <input type="checkbox"/> |            |          |
| Diarrhea (≥3 loose/looser than normal stools/24hr period)                            | <input type="checkbox"/> | <input type="checkbox"/> |            |          |
| Pneumonia                                                                            | <input type="checkbox"/> | <input type="checkbox"/> |            |          |
| Acute respiratory distress syndrome                                                  | <input type="checkbox"/> | <input type="checkbox"/> |            |          |
| Neurological symptoms,<br>What type of neurologic symptoms did they experience? ____ | <input type="checkbox"/> | <input type="checkbox"/> |            |          |
| Other,<br>What type of other symptoms did they experience? ____                      | <input type="checkbox"/> | <input type="checkbox"/> |            |          |

**Did this person receive an abnormal chest X-ray? (E, S)**

- ☐ Yes  
☐ No  
☐ Unknown

**Did the person die as a result of this illness? (E, S)**

- ☐ Yes, What day did they die (if you don't remember, please approximate) MMDDYY  
☐ No

**Was he/she hospitalized? (E, S)**

- ☐ Yes  
☐ No, What other medical care did they receive related to their infection? \_\_\_\_\_  
☐ Unknown

**What day were they admitted to the hospital (if you don't remember, please approximate)**  
**(E, S) MMDDYY**

**What day were they discharged from the hospital (if you don't remember, please approximate. If they are still hospitalized, leave blank) (E, S) MMDDYY**

If you had more than 3 family members diagnosed with SARS-COV-2/COVID-19, please list your relationship, the month and date of first illness (or indicate that they had no symptoms), whether they were hospitalized, and outcome of other family members diagnosed. (E, S) \_\_\_\_\_

Do you have any additional thoughts you would like to share with us about your experience with an immediate family member or person living in your household testing positive for SARS-COV-2/COVID-19 and about their related illness and treatment? If so, please provide them in the box below. (E, S) \_\_\_\_\_

**2a. If not tested or had a negative SARS-COV-2 or COVID-19 test, have you experienced any of the following symptoms or been diagnosed with any of the following since becoming pregnant? (E, S)**

|                                                                             | Yes                      | No                       | Start date | End date |
|-----------------------------------------------------------------------------|--------------------------|--------------------------|------------|----------|
| Fever >100.4F (38C)c                                                        | <input type="checkbox"/> | <input type="checkbox"/> |            |          |
| Subjective fever (felt feverish)                                            | <input type="checkbox"/> | <input type="checkbox"/> |            |          |
| Chills                                                                      | <input type="checkbox"/> | <input type="checkbox"/> |            |          |
| Repeated shaking with chills                                                | <input type="checkbox"/> | <input type="checkbox"/> |            |          |
| Muscle aches (myalgia)                                                      | <input type="checkbox"/> | <input type="checkbox"/> |            |          |
| Runny nose (rhinorrhea)                                                     | <input type="checkbox"/> | <input type="checkbox"/> |            |          |
| Sore throat                                                                 | <input type="checkbox"/> | <input type="checkbox"/> |            |          |
| Cough (new onset or worsening of chronic cough)                             | <input type="checkbox"/> | <input type="checkbox"/> |            |          |
| Shortness of breath (dyspnea)                                               | <input type="checkbox"/> | <input type="checkbox"/> |            |          |
| Nausea or vomiting                                                          | <input type="checkbox"/> | <input type="checkbox"/> |            |          |
| Headache                                                                    | <input type="checkbox"/> | <input type="checkbox"/> |            |          |
| Ageusia (loss of taste)                                                     | <input type="checkbox"/> | <input type="checkbox"/> |            |          |
| Anosia (loss of smell)                                                      | <input type="checkbox"/> | <input type="checkbox"/> |            |          |
| Abdominal pain                                                              | <input type="checkbox"/> | <input type="checkbox"/> |            |          |
| Diarrhea (≥3 loose/looser than normal stools/24hr period)                   | <input type="checkbox"/> | <input type="checkbox"/> |            |          |
| Pneumonia                                                                   | <input type="checkbox"/> | <input type="checkbox"/> |            |          |
| Acute respiratory distress syndrome                                         | <input type="checkbox"/> | <input type="checkbox"/> |            |          |
| Influenza (flu)                                                             | <input type="checkbox"/> | <input type="checkbox"/> |            |          |
| Other symptom(s),<br>What type of other symptoms did they experience? _____ | <input type="checkbox"/> | <input type="checkbox"/> |            |          |

**3. Since the COVID-19 outbreak, have you reduced the frequency in which you receive in-person prenatal care? (E, S)**

- ☐ Yes, completely stopped in-person care
- ☐ Yes, reduced in-person care but still have some in-person appointments
- ☐ No

**4. Since the COVID-19 outbreak, have you used a video visit to talk to a healthcare provider? (E, S)**

- ☐ Yes
- ☐ No

**5. Since the COVID-19 outbreak have you used a phone visit to talk to a healthcare provider? (E, S)**

- ☐ Yes
- ☐ No

**6. Please indicate the extent to which you agree or disagree with the following statements as they relate to your prenatal care and the COVID-19 pandemic. (E, S)**

|                                                                                                                                                      | Strongly disagree        | Disagree                 | Neutral                  | Agree                    | Strongly agree           |
|------------------------------------------------------------------------------------------------------------------------------------------------------|--------------------------|--------------------------|--------------------------|--------------------------|--------------------------|
| I prefer video visits with my prenatal care provider when possible.                                                                                  | <input type="checkbox"/> |
| I prefer phone visits with my prenatal care provider when possible.                                                                                  | <input type="checkbox"/> |
| I prefer in-person visits with my prenatal care provider when possible.                                                                              | <input type="checkbox"/> |
| After the COVID-19 pandemic is over, I think it would be useful for more prenatal care visits to be done by video or by phone rather than in person. | <input type="checkbox"/> |
| After the COVID-19 pandemic is over, I think it would be useful for most prenatal visits to go back to being in person.                              | <input type="checkbox"/> |
| I feel like my prenatal care has been better than it would have been before the COVID-19 pandemic.                                                   | <input type="checkbox"/> |

**7-10. Michigan COVID-19 Pregnancy. (E, S)**

**11. In the space below, can you tell us more about how your birth plans been affected? How have your desires and plans for birth changed, and how have they remained the same? (E, S)** \_\_\_\_\_

**12. Please rate each of the following statements as they relate to how you currently feel about COVID-19. (E, S)**

|                                                                                                                                                             | None of the time         | A little of the time     | Some of the time         | Most of the time         | All of the time          |
|-------------------------------------------------------------------------------------------------------------------------------------------------------------|--------------------------|--------------------------|--------------------------|--------------------------|--------------------------|
| Because of COVID-19, I am worried about not having a support person with me during labor and delivery if I give birth in the hospital.                      | <input type="checkbox"/> |
| Because of COVID-19, I am worried about being be treated or viewed unfairly by hospital staff during labor and delivery because of my race or ethnic group. | <input type="checkbox"/> |
| Because of COVID-19, I have felt increased stress about food running out or being unavailable.                                                              | <input type="checkbox"/> |
| Because of COVID-19, I have felt increased stress about losing a job or decrease in family income.                                                          | <input type="checkbox"/> |
| Over the past few weeks, I have felt increased stress about myself, my baby, or someone in my family getting infected with COVID-19                         | <input type="checkbox"/> |

**13. Thinking back on the last week, have you experienced any of the following? (E, S)**

|                                  | Yes                      | No                       | Start date | End date |
|----------------------------------|--------------------------|--------------------------|------------|----------|
| Fever >100.4F (38C)c             | <input type="checkbox"/> | <input type="checkbox"/> |            |          |
| Subjective fever (felt feverish) | <input type="checkbox"/> | <input type="checkbox"/> |            |          |
| Chills                           | <input type="checkbox"/> | <input type="checkbox"/> |            |          |
| Repeated shaking with chills     | <input type="checkbox"/> | <input type="checkbox"/> |            |          |

|                                                                  |                          |                          |  |  |
|------------------------------------------------------------------|--------------------------|--------------------------|--|--|
| Muscle aches (myalgia)                                           | <input type="checkbox"/> | <input type="checkbox"/> |  |  |
| Runny nose (rhinorrhea)                                          | <input type="checkbox"/> | <input type="checkbox"/> |  |  |
| Sore throat                                                      | <input type="checkbox"/> | <input type="checkbox"/> |  |  |
| Cough (new onset or worsening of chronic cough)                  | <input type="checkbox"/> | <input type="checkbox"/> |  |  |
| Shortness of breath (dyspnea)                                    | <input type="checkbox"/> | <input type="checkbox"/> |  |  |
| Nausea or vomiting                                               | <input type="checkbox"/> | <input type="checkbox"/> |  |  |
| Headache                                                         | <input type="checkbox"/> | <input type="checkbox"/> |  |  |
| Ageusia (loss of taste)                                          | <input type="checkbox"/> | <input type="checkbox"/> |  |  |
| Anosia (loss of smell)                                           | <input type="checkbox"/> | <input type="checkbox"/> |  |  |
| Abdominal pain                                                   | <input type="checkbox"/> | <input type="checkbox"/> |  |  |
| Diarrhea ( $\geq 3$ loose/looser than normal stools/24hr period) | <input type="checkbox"/> | <input type="checkbox"/> |  |  |

**Did you seek medical care (by visit or call) for these symptoms? (E, S)**

☐ Yes

What did your provider recommend (including over the counter or prescription medications)?

\_\_\_\_\_

☐ No

Why didn't you receive medical care? \_\_\_\_\_

**14. Thinking back on the last week, have anyone living with you experienced any of the following? (E, S)**

|                                                                  | Yes                      | No                       | Start date | End date |
|------------------------------------------------------------------|--------------------------|--------------------------|------------|----------|
| Fever $>100.4^{\circ}\text{F}$ ( $38^{\circ}\text{C}$ )c         | <input type="checkbox"/> | <input type="checkbox"/> |            |          |
| Subjective fever (felt feverish)                                 | <input type="checkbox"/> | <input type="checkbox"/> |            |          |
| Chills                                                           | <input type="checkbox"/> | <input type="checkbox"/> |            |          |
| Repeated shaking with chills                                     | <input type="checkbox"/> | <input type="checkbox"/> |            |          |
| Muscle aches (myalgia)                                           | <input type="checkbox"/> | <input type="checkbox"/> |            |          |
| Runny nose (rhinorrhea)                                          | <input type="checkbox"/> | <input type="checkbox"/> |            |          |
| Sore throat                                                      | <input type="checkbox"/> | <input type="checkbox"/> |            |          |
| Cough (new onset or worsening of chronic cough)                  | <input type="checkbox"/> | <input type="checkbox"/> |            |          |
| Shortness of breath (dyspnea)                                    | <input type="checkbox"/> | <input type="checkbox"/> |            |          |
| Nausea or vomiting                                               | <input type="checkbox"/> | <input type="checkbox"/> |            |          |
| Headache                                                         | <input type="checkbox"/> | <input type="checkbox"/> |            |          |
| Ageusia (loss of taste)                                          | <input type="checkbox"/> | <input type="checkbox"/> |            |          |
| Anosia (loss of smell)                                           | <input type="checkbox"/> | <input type="checkbox"/> |            |          |
| Abdominal pain                                                   | <input type="checkbox"/> | <input type="checkbox"/> |            |          |
| Diarrhea ( $\geq 3$ loose/looser than normal stools/24hr period) | <input type="checkbox"/> | <input type="checkbox"/> |            |          |

**Did he/she seek medical care (by visit or call) for these symptoms? (E, S)**

☐ Yes

What did his/her provider recommend (including over the counter or prescription medications)?

\_\_\_\_\_

☐ No

Why didn't they receive medical care? \_\_\_\_\_

**15. Are you currently sheltering at home/not working in the community? (E, S)**

☐ Yes

☐ No

**16. Are the other people in your household currently sheltering at home/not working in the community? (E, S)**

- ☐ Yes
- ☐ No
- ☐ Not relevant, I live alone

**17. When you are out in the community or at work, how often do you wear a face mask? (E, S)**

- ☐ Never
- ☐ Sometimes
- ☐ Most of the time
- ☐ Always
- ☐ Not relevant, I don't go out in the community

**When you are out in the community or at work, do you try and stay 6-feet away from people? (E, S)**

- ☐ Never
- ☐ Sometimes
- ☐ Most of the time
- ☐ Always

**18. Over the past week, on average how many other people have you been in contact with at less than 6-feet (do not include people you live with)? (E, S) \_\_\_\_\_**

**19. Have you or any members of your immediate or extended group of family or friends experienced any of the following as result of the COVID-19 pandemic? (E, S)**

|                                                    | Yes,<br>Me               | Yes,<br>friends or<br>family who<br>live with me | Yes,<br>family that<br>does not live<br>with me | Yes,<br>friends who<br>do not live<br>with me | No                       |
|----------------------------------------------------|--------------------------|--------------------------------------------------|-------------------------------------------------|-----------------------------------------------|--------------------------|
| Job loss                                           | <input type="checkbox"/> | <input type="checkbox"/>                         | <input type="checkbox"/>                        | <input type="checkbox"/>                      | <input type="checkbox"/> |
| Reduced hours at work                              | <input type="checkbox"/> | <input type="checkbox"/>                         | <input type="checkbox"/>                        | <input type="checkbox"/>                      | <input type="checkbox"/> |
| Inability to pay rent or mortgage                  | <input type="checkbox"/> | <input type="checkbox"/>                         | <input type="checkbox"/>                        | <input type="checkbox"/>                      | <input type="checkbox"/> |
| Eviction                                           | <input type="checkbox"/> | <input type="checkbox"/>                         | <input type="checkbox"/>                        | <input type="checkbox"/>                      | <input type="checkbox"/> |
| Homelessness                                       | <input type="checkbox"/> | <input type="checkbox"/>                         | <input type="checkbox"/>                        | <input type="checkbox"/>                      | <input type="checkbox"/> |
| Lack of available food                             | <input type="checkbox"/> | <input type="checkbox"/>                         | <input type="checkbox"/>                        | <input type="checkbox"/>                      | <input type="checkbox"/> |
| Lack of fresh food                                 | <input type="checkbox"/> | <input type="checkbox"/>                         | <input type="checkbox"/>                        | <input type="checkbox"/>                      | <input type="checkbox"/> |
| Lack of sleep                                      | <input type="checkbox"/> | <input type="checkbox"/>                         | <input type="checkbox"/>                        | <input type="checkbox"/>                      | <input type="checkbox"/> |
| Lack of sanitation products                        | <input type="checkbox"/> | <input type="checkbox"/>                         | <input type="checkbox"/>                        | <input type="checkbox"/>                      | <input type="checkbox"/> |
| Inability to wash/clean my hands or body regularly | <input type="checkbox"/> | <input type="checkbox"/>                         | <input type="checkbox"/>                        | <input type="checkbox"/>                      | <input type="checkbox"/> |
| Lack of available medicine                         | <input type="checkbox"/> | <input type="checkbox"/>                         | <input type="checkbox"/>                        | <input type="checkbox"/>                      | <input type="checkbox"/> |
| COVID-19 infection                                 | <input type="checkbox"/> | <input type="checkbox"/>                         | <input type="checkbox"/>                        | <input type="checkbox"/>                      | <input type="checkbox"/> |
| COVID-19-related death                             | <input type="checkbox"/> | <input type="checkbox"/>                         | <input type="checkbox"/>                        | <input type="checkbox"/>                      | <input type="checkbox"/> |

**20. In the past month, how would you say your total household income has changed as a result of COVID-19? Would you say it's (E, S)**

- ☐ A lot less
- ☐ Slightly less
- ☐ Roughly the same
- ☐ Slightly more
- ☐ A lot more

**21. Do you have any additional thoughts you would like to share with us about your current feelings about being pregnant at the time of the COVID19 pandemic? If so, please provide them in the box below. (E, S)**

\_\_\_\_\_

**22. We would like to ask you a few last some questions about how the epidemic might affect the choices you make. Suppose you bought a ticket before the epidemic to attend a live concert scheduled two weeks from now. The Governor lifts the ban on such concerts next week. Would you go to the concert? (E)**

- ☐ Yes
- ☐ No

**Suppose you get to the concert and discover the performance is worse than you expected. Would you leave? (E)**

- ☐ Yes
- ☐ No

**23. If ticket cost \$200 would you go to the concert? (E)**

- ☐ Yes
- ☐ No

**Please provide us any input you may have about your experience with completing this survey in the box below. (E, S)**\_\_\_\_\_
